# Supplementary material for: Evaluation of the antitumor effects of c-Myc-Max heterodimerization inhibitor 100258-F4 in ovarian cancer cells
Source: Springer Nature journal article supplement (doi:10.1186/s12967-014-0226-x), 2014-08-20
Supplement: MOESM6 [file 9766310]

**Table.1. Patient pathologic features**

| <b>Patient ID</b> | <b>AGE</b> | <b>Diagnosis</b> | <b>Stage</b> | <b>Grade</b> | <b>IC50 (uM)</b> | <b>c-MYC</b> |
|-------------------|------------|------------------|--------------|--------------|------------------|--------------|
| OC1               | 65         | Serous           | IIIA         | G1           | 27               | Positive     |
| OC2               | 72         | Serous           | IIIC         | G3           | 84               | Positive     |
| OC3               | 48         | Serous           | IIA          | G1           | 28               | Positive     |
| OC4               | 36         | Serous           | IC           | G1           | 56               | Positive     |
| OC5               | 66         | Serous           | IIIA         | G1           | 26               | Positive     |
| OC6               | 61         | Mucous           | IIIA         | G2           | >100             | Positive     |
| OC7               | 55         | Serous           | IIIC         | G3           | N                | Positive     |
| OC8               | 51         | Serous           | IIA          | G3           | 62               | Positive     |
| OC9               | 69         | Serous           | IIIC         | G3           | >100             | Positive     |
| OC10              | 53         | Serous           | IIIA         | G1           | 30               | Positive     |
| OC11              | 38         | Mucous           | IA           | G1           | >100             | Positive     |
| OC12              | 47         | Serous           | IIIC         | G3           | N                | Positive     |
| OC13              | 64         | Mucous           | IIIA         | G1           | 18               | Positive     |
| OC14              | 66         | Serous           | IIIC         | G3           | N                | Positive     |
| OC15              | 62         | Serous           | IIIA         | G2           | >100             | Positive     |
| OC16              | 57         | Serous           | IIIA         | G1           | 22               | Positive     |
| OC17              | 43         | Serous           | IIA          | G3           | 33               | Positive     |
| OC18              | 51         | Serous           | IIIC         | G3           | 16               | Positive     |
